# Supplementary material for: Learning generalizable AI models for multi-center histopathology image classification
Source: PubMed Central journal article supplement (PMC11271637; doi:10.1038/s41698-024-00652-4), 2024-07-19
Supplement: 41698_2024_652_MOESM1_ESM.pdf [file 41698_2024_652_MOESM1_ESM.pdf]

**Supplementary Figure 1:** p-value comparison. The p-value matrix compares the balanced accuracy of different methods using the Wilcoxon signed-rank test, where each cell reflects the p-value between the models in the row and column for **a)** the Ovarian dataset, **a)** the Pleural dataset, **a)** the Bladder dataset, and **a)** the Breast dataset.

**Supplementary Figure 2:** Representative patches. **a)** Source and **b)** target domains for the Ovarian (**first row**), Pleural (**second row**), and Bladder (**third row**) cancer datasets.

**Supplementary Figure 3:** FFT-Enhancer. **a)** An example of the importance of phase spectrum. The morphology and color of each combined image resemble its phase and amplitude spectrum images, respectively. **b)** Some examples of applying the FFT-Enhancer of images with different color spaces.

**Supplementary Figure 4:**  $k$  in VLAD. Balanced accuracy of the model across different values of  $k$  for VLAD encoding for Ovarian, Pleural, Bladder, and Breast datasets.

**Supplementary Table 1:** Slide-level classification performance comparison for Ovarian dataset

**Supplementary Table 2:** Slide-level classification performance comparison for Pleural dataset

**Supplementary Table 3:** Slide-level classification performance comparison for Bladder dataset

**Supplementary Table 4:** Slide-level classification performance comparison for Breast dataset

**Supplementary Table 5:** Slide-level classification performance comparison (balanced accuracy) for different backbones (MobileNet (Mob) and Vision Transformer (ViT))

**Supplementary Table 6:** Slide-level classification performance comparison (balanced accuracy) for experiments with CTransPath

**Supplementary Table 7:** Comparative Analysis of Training Times and Computational Resources where “Training Time” refers to the duration required for training per epoch, measured in minutes, and “Param.” denotes the total parameter count, quantified in millions

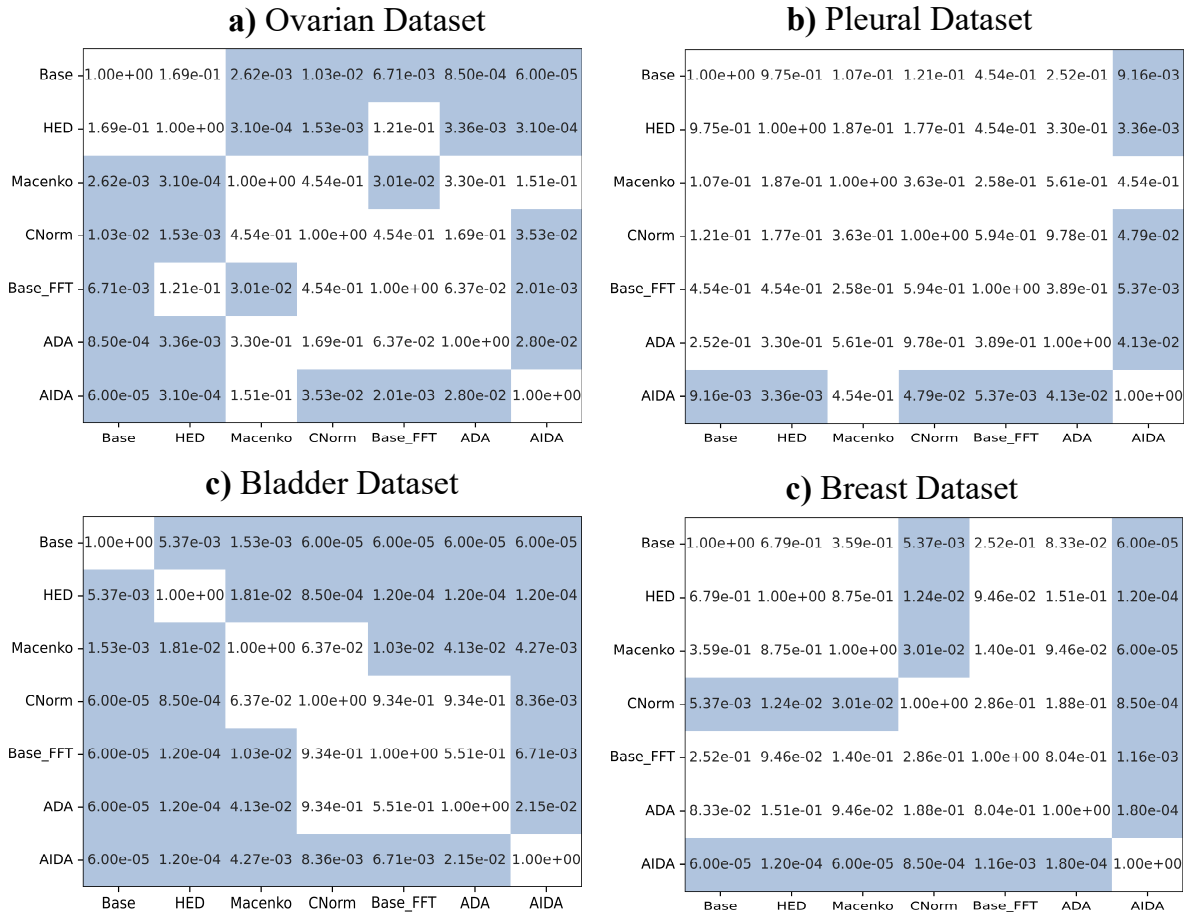

Supplementary Figure 1: p-value comparison. The p-value matrix compares the balanced accuracy of different methods using the Wilcoxon signed-rank test, where each cell reflects the p-value between the models in the row and column for **a)** the Ovarian dataset, **b)** the Pleural dataset, **c)** the Bladder dataset, and **d)** the Breast dataset.

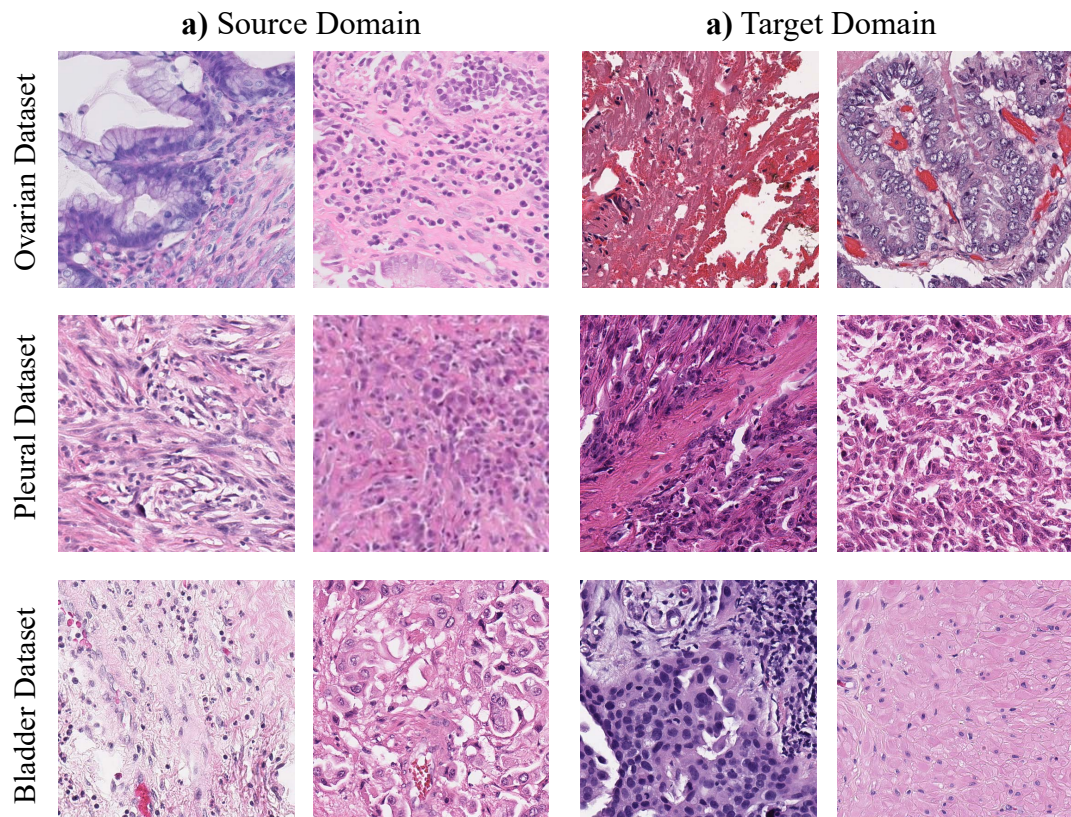

Supplementary Figure 2: Representative patches. **a)** Source and **b)** target domains for the Ovarian (**first row**), Pleural (**second row**), and Bladder (**third row**) cancer datasets.

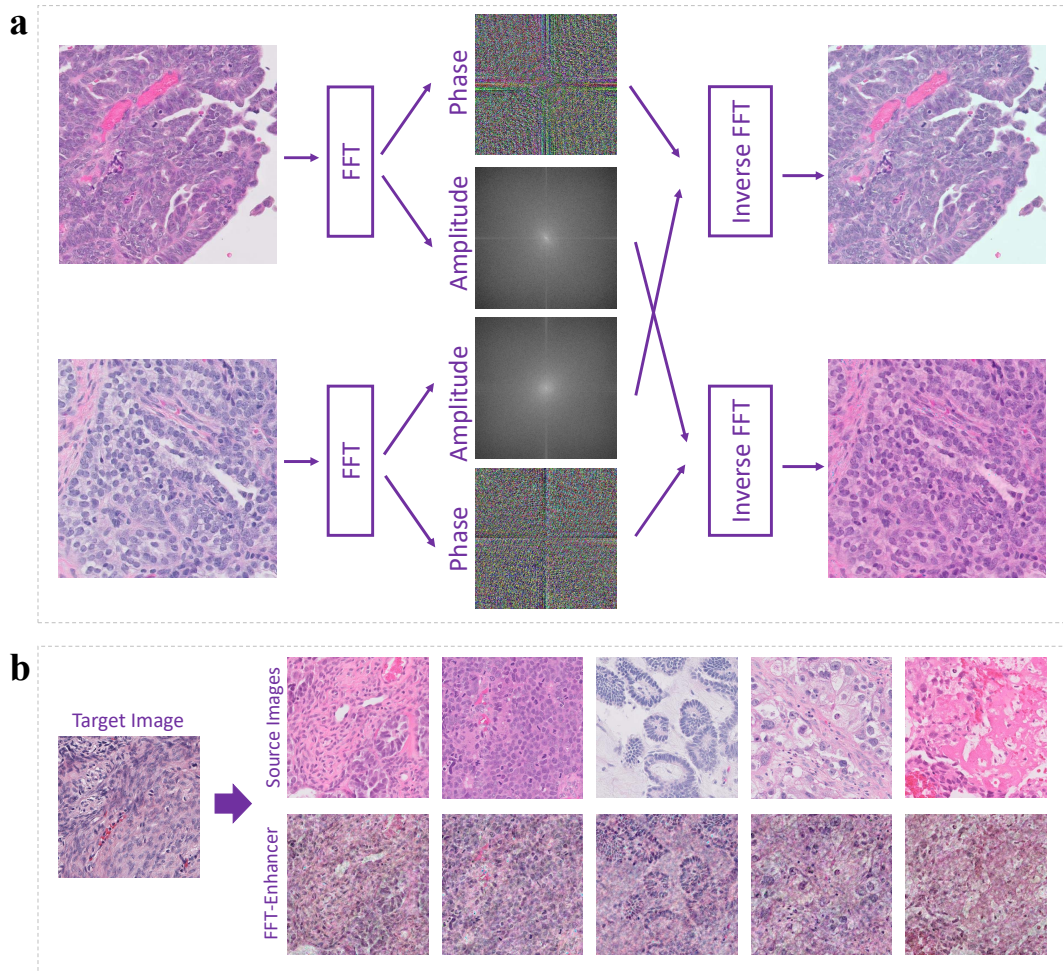

Supplementary Figure 3: FFT-Enhancer. **a)** An example of the importance of phase spectrum. The morphology and color of each combined image resemble its phase and amplitude spectrum images, respectively. **b)** Some examples of applying the FFT-Enhancer of images with different color spaces.

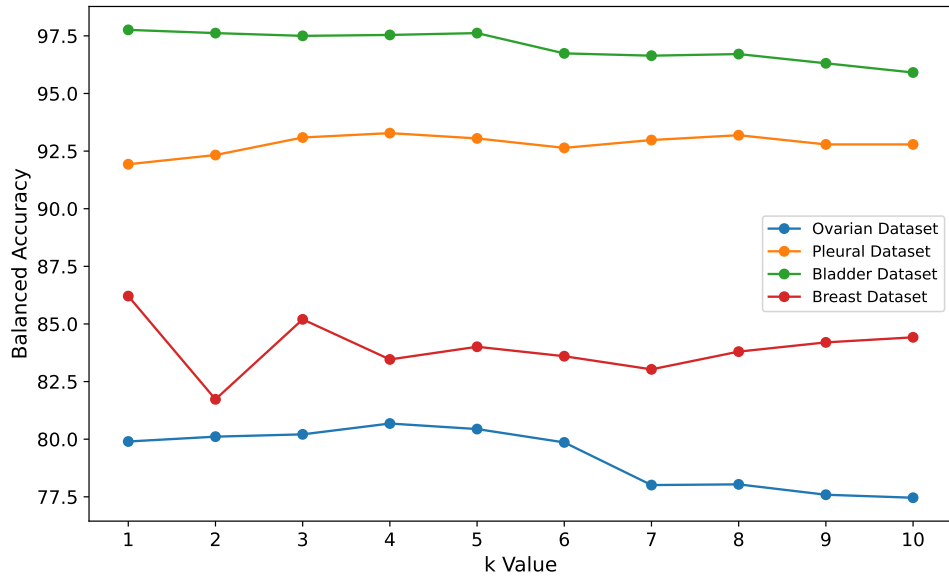

Supplementary Figure 4:  $k$  in VLAD. Balanced accuracy of the model across different values of  $k$  for VLAD encoding for Ovarian, Pleural, Bladder, and Breast datasets.

Supplementary Table 1: Slide-level classification performance comparison for Ovarian dataset

| Split   | Method       | Source       |               |               |               | Target       |               |               |               |
|---------|--------------|--------------|---------------|---------------|---------------|--------------|---------------|---------------|---------------|
|         |              | BACC         | Kappa         | F1            | AUC           | BACC         | Kappa         | F1            | AUC           |
| Split 1 | Baseline     | 79.77        | 0.7246        | 0.7838        | <b>0.9350</b> | 61.08        | 0.6127        | 0.6131        | 0.8910        |
|         | HED[21]      | 79.07        | 0.7282        | 0.7814        | 0.9322        | 65.61        | 0.6583        | 0.6746        | 0.9056        |
|         | Macenko [26] | 79.30        | 0.7102        | 0.7719        | 0.9319        | 73.56        | 0.6790        | 0.7400        | 0.9329        |
|         | CNorm [12]   | 80.62        | 0.7251        | <b>0.7892</b> | 0.9316        | 74.79        | 0.7165        | 0.7467        | 0.9300        |
|         | Baseline-FFT | 80.71        | <b>0.7343</b> | 0.7826        | 0.9318        | 72.21        | 0.7026        | 0.7304        | 0.9284        |
|         | ADA          | 79.89        | 0.7250        | 0.7811        | 0.9297        | 75.49        | 0.7311        | 0.7525        | 0.9392        |
|         | <b>AIDA</b>  | <b>81.10</b> | 0.7313        | 0.7889        | 0.9329        | <b>76.54</b> | <b>0.7588</b> | <b>0.7885</b> | <b>0.9429</b> |
| Split 2 | Baseline     | 78.46        | 0.7060        | 0.7870        | 0.9445        | 71.29        | 0.6753        | 0.7191        | 0.9144        |
|         | HED[21]      | 78.77        | <b>0.7162</b> | 0.7960        | 0.9426        | 71.21        | 0.6940        | 0.7466        | 0.9378        |
|         | Macenko [26] | 77.37        | 0.7010        | 0.7874        | 0.9429        | 74.13        | 0.6838        | 0.7543        | <b>0.9442</b> |
|         | CNorm [12]   | 76.86        | 0.6912        | 0.7726        | 0.9361        | 72.33        | 0.6764        | 0.7341        | 0.9327        |
|         | Baseline-FFT | 77.60        | 0.7100        | 0.7851        | 0.9423        | 74.81        | 0.7194        | 0.7736        | 0.9408        |
|         | ADA          | 78.74        | 0.7133        | 0.7719        | 0.9318        | 77.95        | 0.7718        | 0.7999        | 0.9374        |
|         | <b>AIDA</b>  | <b>78.92</b> | 0.7158        | <b>0.7994</b> | <b>0.9494</b> | <b>80.08</b> | <b>0.7917</b> | <b>0.8313</b> | 0.9412        |
| Split 3 | Baseline     | 79.81        | 0.7055        | 0.7714        | 0.9483        | 61.59        | 0.5939        | 0.5986        | 0.8848        |
|         | HED[21]      | 79.63        | 0.7105        | 0.7835        | 0.9561        | 64.39        | 0.6357        | 0.6635        | 0.9168        |
|         | Macenko [26] | 79.98        | 0.7162        | 0.7718        | 0.9518        | <b>72.78</b> | 0.6556        | 0.7189        | 0.9473        |
|         | CNorm [12]   | 79.94        | 0.7293        | 0.7866        | 0.9301        | 69.31        | 0.6464        | 0.6893        | 0.9344        |
|         | Baseline-FFT | 78.74        | 0.7006        | 0.7732        | 0.9516        | 63.82        | 0.6448        | 0.6611        | 0.9288        |
|         | ADA          | 80.29        | 0.7329        | 0.7964        | 0.9536        | 69.03        | 0.6812        | 0.6968        | 0.9484        |
|         | <b>AIDA</b>  | <b>82.02</b> | <b>0.7403</b> | <b>0.8073</b> | <b>0.9589</b> | 70.84        | <b>0.7053</b> | <b>0.7333</b> | <b>0.9492</b> |
| Average | Baseline     | 79.35        | 0.7120        | 0.7807        | 0.9426        | 64.65        | 0.6273        | 0.6436        | 0.8967        |
|         | HED[21]      | 79.16        | 0.7183        | 0.7869        | 0.9436        | 67.07        | 0.6627        | 0.6949        | 0.9201        |
|         | Macenko [26] | 78.89        | 0.7091        | 0.7770        | 0.9422        | 73.49        | 0.6728        | 0.7377        | 0.9415        |
|         | CNorm [12]   | 79.14        | 0.7152        | 0.7828        | 0.9326        | 72.14        | 0.6798        | 0.7234        | 0.9324        |
|         | Baseline-FFT | 79.02        | 0.7150        | 0.7803        | 0.9426        | 70.28        | 0.6889        | 0.7217        | 0.9327        |
|         | ADA          | 79.64        | 0.7237        | 0.7831        | 0.9384        | 74.16        | 0.7280        | 0.7831        | 0.9384        |
|         | <b>AIDA</b>  | <b>80.68</b> | <b>0.7291</b> | <b>0.7985</b> | <b>0.9471</b> | <b>75.82</b> | <b>0.7519</b> | <b>0.7844</b> | <b>0.9444</b> |

Supplementary Table 2: Slide-level classification performance comparison for Pleural dataset

| Split   | Method       | Source       |               |               |               | Target       |               |               |               |
|---------|--------------|--------------|---------------|---------------|---------------|--------------|---------------|---------------|---------------|
|         |              | BACC         | Kappa         | F1            | AUC           | BACC         | Kappa         | F1            | AUC           |
| Split 1 | Baseline     | <b>97.78</b> | <b>0.9580</b> | <b>0.9790</b> | <b>1.000</b>  | 82.69        | 0.6576        | 0.8198        | <b>0.9920</b> |
|         | HED[21]      | 95.96        | 0.9164        | 0.9581        | 0.9973        | 84.76        | 0.6970        | 0.8465        | 0.9524        |
|         | Macenko [26] | 96.10        | 0.9174        | 0.9586        | 0.9957        | 82.71        | 0.6581        | 0.8236        | 0.9815        |
|         | CNorm [12]   | 95.91        | 0.9082        | 0.9434        | 0.9920        | 82.78        | 0.6584        | 0.8253        | 0.9413        |
|         | Baseline-FFT | 96.42        | 0.9272        | 0.9636        | 0.9931        | 82.31        | 0.6656        | 0.8189        | 0.9658        |
|         | ADA          | 97.14        | 0.9381        | 0.9690        | 0.9941        | 83.13        | 0.6659        | 0.8282        | 0.9655        |
|         | <b>AIDA</b>  | 97.59        | 0.9483        | 0.9741        | 0.9984        | <b>86.97</b> | <b>0.7423</b> | <b>0.8696</b> | 0.9789        |
| Split 2 | Baseline     | 89.25        | 0.8005        | 0.9000        | 0.9783        | 81.62        | 0.6355        | 0.8121        | 0.9071        |
|         | HED[21]      | <b>93.08</b> | <b>0.8590</b> | <b>0.9295</b> | 0.9705        | 79.87        | 0.5991        | 0.7947        | 0.8960        |
|         | Macenko [26] | 88.83        | 0.7898        | 0.8947        | 0.9617        | 83.97        | 0.6816        | 0.8378        | <b>0.9630</b> |
|         | CNorm [12]   | 82.42        | 0.6726        | 0.8401        | 0.9372        | 83.16        | 0.6660        | 0.8172        | 0.9313        |
|         | Baseline-FFT | 89.92        | 0.8111        | 0.9050        | 0.9689        | 78.96        | 0.6210        | 0.7845        | 0.9254        |
|         | ADA          | 88.42        | 0.7802        | 0.8898        | 0.9639        | 83.20        | 0.6665        | 0.8299        | 0.9296        |
|         | <b>AIDA</b>  | 91.08        | 0.8250        | 0.9123        | <b>0.9806</b> | <b>84.88</b> | <b>0.6979</b> | <b>0.8483</b> | 0.9342        |
| Split 3 | Baseline     | 89.92        | 0.8269        | 0.9131        | 0.9628        | 65.78        | 0.3196        | 0.6175        | 0.8749        |
|         | HED[21]      | 89.43        | 0.8059        | 0.9026        | 0.9640        | 65.84        | 0.3197        | 0.6092        | 0.7832        |
|         | Macenko [26] | <b>94.20</b> | 0.8981        | <b>0.9490</b> | <b>0.9948</b> | <b>76.20</b> | <b>0.5279</b> | <b>0.7504</b> | 0.9020        |
|         | CNorm [12]   | 93.80        | <b>0.8988</b> | 0.9431        | 0.9897        | 72.71        | 0.4896        | 0.7072        | 0.8932        |
|         | Baseline-FFT | 90.14        | 0.8173        | 0.9083        | 0.9800        | 70.46        | 0.4356        | 0.6829        | 0.9006        |
|         | ADA          | 91.34        | 0.8495        | 0.9244        | 0.9486        | 72.83        | 0.4598        | 0.7160        | 0.8558        |
|         | <b>AIDA</b>  | 91.17        | 0.8297        | 0.9146        | 0.9863        | 75.83        | 0.5206        | 0.7485        | <b>0.9268</b> |
| Average | Baseline     | 92.32        | 0.8618        | 0.9307        | 0.9804        | 76.70        | 0.5376        | 0.7498        | 0.9247        |
|         | HED[21]      | 92.82        | 0.8604        | 0.9301        | 0.9773        | 76.82        | 0.5386        | 0.7501        | 0.8772        |
|         | Macenko [26] | 93.04        | <b>0.8684</b> | 0.9341        | <b>0.9841</b> | 80.96        | 0.6225        | 0.8039        | <b>0.9488</b> |
|         | CNorm [12]   | 90.71        | 0.8265        | 0.9089        | 0.9730        | 79.55        | 0.6047        | 0.7832        | 0.9219        |
|         | Baseline-FFT | 92.16        | 0.8519        | 0.9256        | 0.9807        | 77.24        | 0.5741        | 0.7621        | 0.9306        |
|         | ADA          | 92.30        | 0.8559        | 0.9277        | 0.9689        | 79.72        | 0.5974        | 0.7914        | 0.9170        |
|         | <b>AIDA</b>  | <b>93.28</b> | 0.8677        | 0.9337        | <b>0.9884</b> | <b>82.56</b> | <b>0.6536</b> | <b>0.8221</b> | 0.9466        |



Supplementary Table 3: Slide-level classification performance comparison for Bladder dataset

| Split   | Method       | Source       |               |               |               | Target       |               |               |               |
|---------|--------------|--------------|---------------|---------------|---------------|--------------|---------------|---------------|---------------|
|         |              | BACC         | Kappa         | F1            | AUC           | BACC         | Kappa         | F1            | AUC           |
| Split 1 | Baseline     | <b>99.73</b> | <b>0.9928</b> | <b>0.9964</b> | <b>1</b>      | 53.46        | 0.0751        | 0.4316        | 0.6991        |
|         | HED[21]      | 99.28        | 0.9856        | 0.9928        | 1             | 60.22        | 0.2106        | 0.5456        | 0.7430        |
|         | Macenko [26] | 99.50        | 0.9927        | 0.9964        | 1             | 69.34        | 0.3969        | 0.6734        | 0.8877        |
|         | CNorm [12]   | 99.09        | 0.9852        | 0.9926        | <b>1</b>      | 69.27        | 0.4028        | 0.6744        | <b>0.9317</b> |
|         | Baseline-FFT | 98.56        | 0.9675        | 0.9838        | 0.9982        | 71.16        | 0.4438        | 0.7049        | 0.8847        |
|         | ADA          | 96.76        | 0.9157        | 0.9577        | <b>1</b>      | 69.42        | 0.4022        | 0.6797        | 0.8411        |
|         | <b>AIDA</b>  | 98.38        | 0.9577        | 0.9788        | <b>1</b>      | <b>73.36</b> | <b>0.4802</b> | <b>0.7343</b> | 0.8561        |
| Split 2 | Baseline     | 95.90        | 0.9140        | 0.9567        | 0.9946        | 52.92        | 0.0636        | 0.4148        | 0.8686        |
|         | HED[21]      | 96.15        | 0.9203        | 0.9599        | 0.9997        | 53.90        | 0.0849        | 0.4434        | 0.7982        |
|         | Macenko [26] | <b>99.17</b> | <b>0.9840</b> | <b>0.9920</b> | <b>0.9999</b> | 60.02        | 0.2117        | 0.5395        | 0.8916        |
|         | CNorm [12]   | 97.15        | 0.9406        | 0.9703        | 0.9975        | 76.01        | 0.5396        | 0.7547        | <b>0.9647</b> |
|         | Baseline-FFT | 93.04        | 0.8594        | 0.9295        | 0.9919        | 75.69        | 0.5267        | 0.7457        | 0.9453        |
|         | ADA          | 89.66        | 0.7854        | 0.8915        | 0.9802        | 72.12        | 0.4613        | 0.7064        | 0.9415        |
|         | <b>AIDA</b>  | 94.91        | 0.8965        | 0.9481        | 0.9951        | <b>80.89</b> | <b>0.6320</b> | <b>0.8091</b> | 0.9483        |
| Split 3 | Baseline     | 98.62        | 0.9721        | 0.986         | <b>1</b>      | 57.94        | 0.1709        | 0.5197        | 0.8515        |
|         | HED[21]      | 97.02        | 0.9413        | 0.9706        | 0.9986        | 58.85        | 0.1898        | 0.5375        | 0.8687        |
|         | Macenko [26] | 96.55        | 0.9315        | 0.9656        | 0.9995        | 69.91        | 0.4137        | 0.6826        | 0.9149        |
|         | CNorm [12]   | 97.27        | 0.9443        | 0.9721        | <b>1</b>      | 75.92        | 0.539         | 0.7578        | <b>0.9631</b> |
|         | Baseline-FFT | 98.64        | 0.9721        | 0.986         | 0.9991        | 76.59        | 0.5497        | 0.7664        | 0.9408        |
|         | ADA          | 98.57        | 0.972         | 0.986         | <b>1</b>      | 77.90        | 0.5716        | 0.7756        | 0.9372        |
|         | <b>AIDA</b>  | <b>100</b>   | <b>1</b>      | <b>1</b>      | <b>1</b>      | <b>78.69</b> | <b>0.5886</b> | <b>0.7884</b> | 0.9366        |
| Average | Baseline     | 98.08        | 0.9596        | 0.9797        | 0.9982        | 54.77        | 0.1032        | 0.4554        | 0.8064        |
|         | HED[21]      | 97.48        | 0.9491        | 0.9744        | 0.9994        | 57.66        | 0.1618        | 0.5088        | 0.8033        |
|         | Macenko [26] | <b>98.41</b> | <b>0.9694</b> | <b>0.9847</b> | <b>0.9998</b> | 66.42        | 0.3408        | 0.6318        | 0.8981        |
|         | CNorm [12]   | 97.84        | 0.9567        | 0.9783        | <b>0.9992</b> | 73.73        | 0.4938        | 0.7290        | <b>0.9532</b> |
|         | Baseline-FFT | 96.75        | 0.9330        | 0.9664        | 0.9964        | 74.48        | 0.5067        | 0.7390        | 0.9236        |
|         | ADA          | 95.00        | 0.8910        | 0.9451        | 0.9934        | 73.15        | 0.4784        | 0.7206        | 0.9066        |
|         | <b>AIDA</b>  | 97.76        | 0.9514        | 0.9756        | 0.9984        | <b>77.65</b> | <b>0.5669</b> | <b>0.7733</b> | 0.9137        |

Supplementary Table 4: Slide-level classification performance comparison for Breast dataset

| Split   | Method       | Source       |               |               |               | Target       |               |               |               |
|---------|--------------|--------------|---------------|---------------|---------------|--------------|---------------|---------------|---------------|
|         |              | BACC         | Kappa         | F1            | AUC           | BACC         | Kappa         | F1            | AUC           |
| Split 1 | Baseline     | 79.37        | 0.4248        | 0.6877        | 0.8302        | 53.17        | 0.0671        | 0.5129        | 0.4938        |
|         | HED[21]      | <b>84.43</b> | <b>0.5279</b> | <b>0.7485</b> | 0.8949        | 54.32        | 0.1093        | 0.5208        | 0.4648        |
|         | Macenko [26] | 69.44        | 0.2479        | 0.5383        | 0.8455        | 51.66        | 0.0463        | 0.4487        | 0.6420        |
|         | CNorm [12]   | 79.59        | 0.5071        | 0.7395        | 0.9025        | 61.75        | 0.2805        | 0.6187        | 0.7555        |
|         | Baseline-FFT | 70.42        | 0.2524        | 0.5488        | 0.8742        | 52.75        | 0.0750        | 0.4715        | 0.7126        |
|         | ADA          | 79.45        | 0.4157        | 0.6749        | 0.9382        | 54.35        | 0.1120        | 0.5151        | 0.7082        |
|         | <b>AIDA</b>  | 82.48        | 0.4857        | 0.7214        | <b>0.9435</b> | <b>74.45</b> | <b>0.5002</b> | <b>0.7475</b> | <b>0.7892</b> |
| Split 2 | Baseline     | 75.85        | 0.4253        | 0.6948        | 0.7903        | 54.28        | 0.0549        | 0.4808        | 0.5398        |
|         | HED[21]      | 81.53        | 0.5189        | 0.7441        | 0.8956        | 68.79        | 0.3676        | 0.6813        | 0.7212        |
|         | Macenko [26] | 83.37        | 0.5844        | 0.7862        | 0.9109        | 68.87        | 0.3953        | 0.6938        | 0.8029        |
|         | CNorm [12]   | <b>97.06</b> | <b>0.9258</b> | <b>0.9626</b> | <b>0.9969</b> | 66.58        | 0.3772        | 0.6729        | 0.8158        |
|         | Baseline-FFT | 83.82        | 0.5739        | 0.7776        | 0.9428        | 73.95        | 0.5130        | 0.7534        | 0.8326        |
|         | ADA          | 82.73        | 0.5424        | 0.7579        | 0.9337        | 69.64        | 0.3981        | 0.6967        | 0.7542        |
|         | <b>AIDA</b>  | 84.75        | 0.5926        | 0.7880        | 0.9356        | <b>75.27</b> | <b>0.4943</b> | <b>0.7423</b> | <b>0.8474</b> |
| Split 3 | Baseline     | 88.03        | 0.7601        | 0.8800        | 0.9167        | 58.00        | 0.1691        | 0.5730        | 0.5965        |
|         | HED[21]      | 89.46        | 0.7890        | 0.8945        | 0.9637        | 49.60        | -0.0108       | 0.4344        | 0.5058        |
|         | Macenko [26] | 88.00        | 0.7576        | 0.8784        | 0.9589        | 56.19        | 0.1513        | 0.5317        | 0.6878        |
|         | CNorm [12]   | 90.29        | 0.7639        | 0.8809        | 0.9641        | 66.84        | 0.3262        | 0.6522        | 0.7760        |
|         | Baseline-FFT | 89.83        | 0.7963        | 0.8982        | <b>0.9738</b> | 55.56        | 0.1422        | 0.5204        | 0.7481        |
|         | ADA          | <b>92.06</b> | <b>0.8401</b> | <b>0.9200</b> | 0.9526        | 57.48        | 0.1855        | 0.5677        | 0.6619        |
|         | <b>AIDA</b>  | 91.39        | 0.8258        | 0.9126        | 0.9481        | <b>72.60</b> | <b>0.4865</b> | <b>0.7411</b> | <b>0.8042</b> |
| Average | Baseline     | 81.08        | 0.5367        | 0.7542        | 0.8457        | 55.15        | 0.0971        | 0.5222        | 0.5434        |
|         | HED[21]      | 85.14        | 0.6119        | 0.7957        | 0.9181        | 57.57        | 0.1554        | 0.5455        | 0.5639        |
|         | Macenko [26] | 80.27        | 0.5300        | 0.7343        | 0.9051        | 58.91        | 0.1976        | 0.5581        | 0.7109        |
|         | CNorm [12]   | <b>88.98</b> | <b>0.7323</b> | <b>0.8610</b> | <b>0.9545</b> | 65.06        | 0.3280        | 0.6479        | 0.7824        |
|         | Baseline-FFT | 81.36        | 0.5408        | 0.7415        | 0.9303        | 60.75        | 0.2434        | 0.5818        | 0.7645        |
|         | ADA          | 84.75        | 0.5994        | 0.7843        | 0.9415        | 60.49        | 0.2319        | 0.5932        | 0.7081        |
|         | <b>AIDA</b>  | 86.21        | 0.6347        | 0.8073        | 0.9424        | <b>74.11</b> | <b>0.4936</b> | <b>0.7436</b> | <b>0.8136</b> |

Supplementary Table 5: Slide-level classification performance comparison (balanced accuracy) for different backbones (MobileNet (Mob) and Vision Transformer (ViT))

| Split   | Method            | Ovarian      |              | Pleural      |              | Bladder      |              | Breast       |              |
|---------|-------------------|--------------|--------------|--------------|--------------|--------------|--------------|--------------|--------------|
|         |                   | Source       | Target       | Source       | Target       | Source       | Target       | Source       | Target       |
| Split 1 | ADA (Mob)         | 77.32        | 75.93        | 86.82        | 81.54        | 100          | 67.91        | 76.47        | 52.28        |
|         | <b>AIDA (Mob)</b> | <b>81.84</b> | <b>76.80</b> | <b>89.55</b> | <b>90.47</b> | <b>100</b>   | <b>69.07</b> | <b>81.21</b> | <b>67.01</b> |
|         | ADA (ViT)         | 80.50        | 71.19        | 93.96        | 89.30        | <b>99.00</b> | 74.48        | 78.87        | 56.91        |
|         | <b>AIDA (ViT)</b> | <b>81.30</b> | <b>73.10</b> | <b>94.55</b> | <b>90.11</b> | 98.56        | <b>76.21</b> | <b>79.84</b> | <b>61.90</b> |
| Split 2 | ADA (Mob)         | 71.19        | 69.87        | 95.33        | 83.73        | 87.44        | 69.48        | 80.13        | 52.16        |
|         | <b>AIDA (Mob)</b> | <b>72.85</b> | <b>70.73</b> | <b>96.42</b> | <b>86.71</b> | <b>87.44</b> | <b>77.76</b> | <b>80.83</b> | <b>74.78</b> |
|         | ADA (ViT)         | 76.18        | 72.99        | 95.42        | 86.71        | 93.08        | 68.52        | 79.58        | 71.18        |
|         | <b>AIDA (ViT)</b> | <b>77.19</b> | <b>72.66</b> | <b>96.67</b> | <b>88.96</b> | <b>94.06</b> | <b>69.86</b> | <b>80.49</b> | <b>73.04</b> |
| Split 3 | ADA (Mob)         | 79.32        | 70.62        | 91.72        | 82.42        | 97.60        | 77.69        | <b>90.26</b> | 55.80        |
|         | <b>AIDA (Mob)</b> | <b>80.05</b> | <b>75.75</b> | <b>95.29</b> | <b>87.69</b> | <b>97.62</b> | <b>82.38</b> | 88.07        | <b>68.95</b> |
|         | ADA (ViT)         | 79.68        | 64.64        | 92.83        | 79.76        | <b>98.05</b> | 80.06        | 89.87        | 56.18        |
|         | <b>AIDA (ViT)</b> | <b>82.27</b> | <b>70.87</b> | <b>96.09</b> | <b>85.01</b> | 96.62        | <b>81.47</b> | <b>90.58</b> | <b>61.35</b> |
| Average | ADA (Mob)         | 75.94        | 72.14        | 91.29        | 82.56        | 95.01        | 71.69        | 82.29        | 53.41        |
|         | <b>AIDA (Mob)</b> | <b>78.25</b> | <b>74.43</b> | <b>93.75</b> | <b>86.53</b> | <b>95.02</b> | <b>76.40</b> | <b>83.37</b> | <b>70.25</b> |
|         | ADA (ViT)         | 78.79        | 69.61        | 94.07        | 85.26        | <b>96.71</b> | 74.35        | 82.77        | 61.42        |
|         | <b>AIDA (ViT)</b> | <b>80.25</b> | <b>72.21</b> | <b>95.77</b> | <b>88.03</b> | 96.41        | <b>75.85</b> | <b>83.64</b> | <b>65.43</b> |

Supplementary Table 6: Slide-level classification performance comparison (balanced accuracy) for experiments with CTransPath

| Split   | Method                       | Ovarian      |              | Pleural      |              | Bladder      |              | Breast       |              |
|---------|------------------------------|--------------|--------------|--------------|--------------|--------------|--------------|--------------|--------------|
|         |                              | Source       | Target       | Source       | Target       | Source       | Target       | Source       | Target       |
| Split 1 | CTransPath [46]              | 67.76        | 47.21        | 87.97        | 73.08        | 98.04        | <b>74.32</b> | 74.77        | 60.01        |
|         | ADA-CTransPath-Aug           | 80.61        | 79.06        | 94.79        | 75.09        | <b>100</b>   | 59.96        | 81.91        | 74.11        |
|         | ADA-CTransPath-NoAug         | 77.39        | 70.09        | 93.05        | 78.45        | 98.26        | 59.83        | 82.97        | 57.32        |
|         | AIDA-CTransPath-Aug          | 81.12        | 79.41        | 94.01        | 76.37        | <b>100</b>   | 60.66        | 81.49        | 71.26        |
|         | <b>AIDA-CTransPath-NoAug</b> | <b>81.40</b> | <b>83.77</b> | <b>95.70</b> | <b>78.69</b> | 98.26        | 59.96        | <b>82.96</b> | <b>76.21</b> |
| Split 2 | CTransPath [46]              | 70.51        | 50.19        | 89.75        | <b>77.38</b> | 85.90        | <b>86.15</b> | <b>80.60</b> | 70.21        |
|         | ADA-CTransPath-Aug           | 82.31        | 81.82        | 94.75        | 66.47        | 90.51        | 65.72        | 80.26        | 80.80        |
|         | ADA-CTransPath-NoAug         | 77.90        | 77.19        | 96.42        | 60.78        | 85.64        | 66.74        | 78.28        | 79.07        |
|         | <b>AIDA-CTransPath-Aug</b>   | <b>82.87</b> | <b>82.49</b> | <b>97.08</b> | 69.22        | <b>92.31</b> | 60.66        | 78.26        | <b>80.53</b> |
|         | AIDA-CTransPath-NoAug        | 82.16        | 81.54        | 95.42        | 70.48        | 88.72        | 67.7         | 78.28        | 79.07        |
| Split 3 | CTransPath [46]              | 69.64        | 50.83        | 75.91        | 56.92        | 88.10        | <b>79.14</b> | 79.96        | 63.56        |
|         | ADA-CTransPath-Aug           | 79.00        | 80.13        | 93.86        | 68.37        | 98.07        | 62.71        | 89.80        | 62.31        |
|         | ADA-CTransPath-NoAug         | 70.13        | 73.71        | <b>94.57</b> | 66.90        | 90.95        | 65.25        | 85.42        | 74.53        |
|         | <b>AIDA-CTransPath-Aug</b>   | <b>80.33</b> | 80.90        | 93.54        | <b>73.25</b> | 95.69        | 64.66        | <b>92.07</b> | 73.91        |
|         | AIDA-CTransPath-NoAug        | 76.86        | <b>82.71</b> | 93.72        | 72.14        | <b>98.10</b> | 66.02        | 87.98        | <b>77.07</b> |
| Average | CTransPath [46]              | 69.30        | 49.41        | 84.54        | 69.13        | 90.68        | <b>79.87</b> | 78.44        | 64.60        |
|         | ADA-CTransPath-Aug           | 80.64        | 80.34        | 94.47        | 69.98        | <b>96.19</b> | 62.71        | <b>83.99</b> | 72.41        |
|         | ADA-CTransPath-NoAug         | 75.14        | 73.66        | 94.68        | 68.71        | 91.62        | 65.25        | 81.22        | 67.74        |
|         | <b>AIDA-CTransPath-Aug</b>   | <b>81.44</b> | 80.93        | 94.88        | 72.95        | 96.00        | 63.42        | 83.94        | 75.23        |
|         | AIDA-CTransPath-NoAug        | 80.14        | <b>82.67</b> | <b>94.95</b> | <b>73.77</b> | 95.03        | 64.56        | 83.07        | <b>77.45</b> |

Supplementary Table 7: Comparative Analysis of Training Times and Computational Resources where “Training Time” refers to the duration required for training per epoch, measured in minutes, and “Param.” denotes the total parameter count, quantified in millions

| <b>Model</b> | <b>Param. (millions)</b> | <b>FLOPs</b>       | <b>Training Time</b> |
|--------------|--------------------------|--------------------|----------------------|
| Base         | 11                       | $9.51 \times 10^9$ | 7                    |
| AIDA         | 78                       | $9.58 \times 10^9$ | 10                   |
